# Supplementary material for: Design, synthesis and isolation of a new 1,2,5-selenadiazolidyl and structural and magnetic characterization of its alkali-metal salts
Source: Royal Society of Chemistry journal article supplement (doi:10.1039/c9nj04069b), 2019-01-01
Supplement: c9nj04069b1.pdf [file c9nj04069b1.pdf]

## Electronic Supporting Information

### Design, Synthesis and Isolation of a New 1,2,5-Selenadiazolidyl and Structural and Magnetic Characterization of its Alkali-Metal Salts

Nikolay A. Semenov,<sup>\*a</sup> Ekaterina A. Radiush,<sup>a</sup> Elena A. Chulanova,<sup>a,b</sup> Alexandra M. Z. Slawin,<sup>c</sup> J. Derek Woollins,<sup>d</sup> Evgeny M. Kadilenko,<sup>b,e</sup> Irina Yu. Bagryanskaya,<sup>a</sup> Irina G. Irtegova,<sup>a</sup> Artem S. Bogomyakov,<sup>b,f</sup> Leonid A. Shundrin,<sup>a,b</sup> Nina P. Gritsan,<sup>e,g</sup> and Andrey V. Zibarev<sup>a,g</sup>

<sup>a</sup> *Institute of Organic Chemistry, Siberian Branch of the Russian Academy of Sciences, 630090 Novosibirsk, Russia.*  
*E-mail: klaus@nioch.nsc.ru*

<sup>b</sup> *Department of Natural Sciences, Novosibirsk State University, 630090 Novosibirsk, Russia*

<sup>c</sup> *School of Chemistry, University of St. Andrews, St Andrews, Fife KY16 9ST, United Kingdom*

<sup>d</sup> *Department of Chemistry, Khalifa University, Abu Dhabi, United Arab Emirates*

<sup>e</sup> *Institute of Chemical Kinetics and Combustion, Siberian Branch of the Russian Academy of Sciences, 630090 Novosibirsk, Russia*

<sup>f</sup> *International Tomography Center, Siberian Branch of the Russian Academy of Sciences, 630090 Novosibirsk, Russia*

<sup>g</sup> *Department of Physics, Novosibirsk State University, 630090 Novosibirsk, Russia*

## Contents

### 1. Single-crystal X-ray diffraction

### 2. Powder X-ray diffraction

### 3. Cyclic voltammetry

### 4. EPR spectroscopy

### 5. SQUID magnetometry

## 1. Single-crystal X-ray diffraction

**Table S1.** Crystallographic data for compounds

| Compound                                   | 1                                | 2                                                                 | 2·thf                                                             | 3·thf                                                              |
|--------------------------------------------|----------------------------------|-------------------------------------------------------------------|-------------------------------------------------------------------|--------------------------------------------------------------------|
| Empirical formula                          | C <sub>6</sub> N <sub>6</sub> Se | C <sub>18</sub> H <sub>24</sub> KN <sub>6</sub> O <sub>6</sub> Se | C <sub>22</sub> H <sub>32</sub> KN <sub>6</sub> O <sub>7</sub> Se | C <sub>22</sub> H <sub>32</sub> NaN <sub>6</sub> O <sub>7</sub> Se |
| Formula mass                               | 235.07                           | 538.49                                                            | 610.59                                                            | 594.48                                                             |
| Temperature [K]                            | 93                               | 296                                                               | 296                                                               | 200                                                                |
| Wavelength [Å]                             | 0.71075                          | 0.71073                                                           | 0.71073                                                           | 0.71073                                                            |
| Crystal system                             | Orthorhombic                     | Monoclinic                                                        | Monoclinic                                                        | Monoclinic                                                         |
| Space group                                | Pbca                             | P 2 <sub>1</sub> /c                                               | P 2 <sub>1</sub> /n                                               | P 2 <sub>1</sub> /n                                                |
| a [Å]                                      | 18.847(5)                        | 12.0108(5)                                                        | 12.3642(7)                                                        | 8.7796(7)                                                          |
| b [Å]                                      | 10.756(3)                        | 19.0336(8)                                                        | 9.2915(5)                                                         | 14.7106(10)                                                        |
| c [Å]                                      | 7.0728(18)                       | 10.8353(4)                                                        | 24.4420(15)                                                       | 22.4551(19)                                                        |
| α [°]                                      | 90.0000                          | 90.000                                                            | 90.000                                                            | 90.000                                                             |
| β [°]                                      | 90.0000                          | 105.018(2)                                                        | 92.661(3)                                                         | 90.426(3)                                                          |
| γ [°]                                      | 90.0000                          | 90.000                                                            | 90.000                                                            | 90.000                                                             |
| Cell Volume (Å <sup>3</sup> )              | 1433.8(7)                        | 2392.44(17)                                                       | 2804.9(3)                                                         | 2900.1(4)                                                          |
| Z                                          | 8                                | 4                                                                 | 4                                                                 | 4                                                                  |
| Density (calcd). [Mgm <sup>-3</sup> ]      | 2.178                            | 1.495                                                             | 1.446                                                             | 1.362                                                              |
| Absorption coefficient [mm <sup>-1</sup> ] | 5.188                            | 1.788                                                             | 1.537                                                             | 1.358                                                              |
| F (000)                                    | 896                              | 1100                                                              | 1260                                                              | 1228                                                               |
| Crystal size [mm]                          | 0.10 × 0.10 × 0.02               | 0.90 × 0.50 × 0.40                                                | 0.38 × 0.12 × 0.03                                                | 0.50 × 0.12 × 0.10                                                 |
| Θ range [°]                                | 2.16-25.35                       | 2.22-30.05                                                        | 2.35-27.56                                                        | 2.28-27.54                                                         |
|                                            | -22 ≤ h ≤ 22                     | -16 ≤ h ≤ 16                                                      | -14 ≤ h ≤ 15                                                      | -11 ≤ h ≤ 11                                                       |
| Index limit                                | -12 ≤ k ≤ 12                     | -26 ≤ k ≤ 25                                                      | -12 ≤ k ≤ 12                                                      | -17 ≤ k ≤ 19                                                       |
|                                            | -8 ≤ l ≤ 8                       | -15 ≤ l ≤ 12                                                      | -31 ≤ l ≤ 31                                                      | -29 ≤ l ≤ 29                                                       |
| Reflections collected                      | 8956                             | 46821                                                             | 32646                                                             | 57566                                                              |
| Independent reflections                    | 1314                             | 6549                                                              | 6388                                                              | 6694                                                               |
|                                            | [R <sub>int</sub> = 0.0443]      | [R <sub>int</sub> = 0.0447]                                       | [R <sub>int</sub> = 0.0518]                                       | [R <sub>int</sub> = 0.0523]                                        |
| Completeness to Θ [%]                      | 99.5                             | 99.9 (2Θ ≤ 50°)                                                   | 98.8                                                              | 100.0                                                              |
| Data/restraints/parameters                 | 1314 / 0 / 118                   | 6549 / 0 / 289                                                    | 6391/0/334                                                        | 6694/6/344                                                         |
| Goodness of fit on F <sup>2</sup>          | 0.958                            | 1.026                                                             | 1.029                                                             | 1.043                                                              |
| R indices [I > 2σ(I)]                      | R <sub>1</sub> = 0.0210          | R <sub>1</sub> = 0.0466                                           | R <sub>1</sub> = 0.0486                                           | R <sub>1</sub> = 0.0366                                            |
|                                            | wR <sub>2</sub> = 0.0481         | wR <sub>2</sub> = 0.1053                                          | wR <sub>2</sub> = 0.1068                                          | wR <sub>2</sub> = 0.0801                                           |
| R indices (all data)                       | R <sub>1</sub> = 0.0265          | R <sub>1</sub> = 0.0917                                           | R <sub>1</sub> = 0.1223                                           | R <sub>1</sub> = 0.0681                                            |
|                                            | wR <sub>2</sub> = 0.0489         | wR <sub>2</sub> = 0.1262                                          | wR <sub>2</sub> = 0.1297                                          | wR <sub>2</sub> = 0.0925                                           |
| <b>CCDC</b>                                | <b>1917743</b>                   | <b>1917744</b>                                                    | <b>1917745</b>                                                    | <b>1917746</b>                                                     |

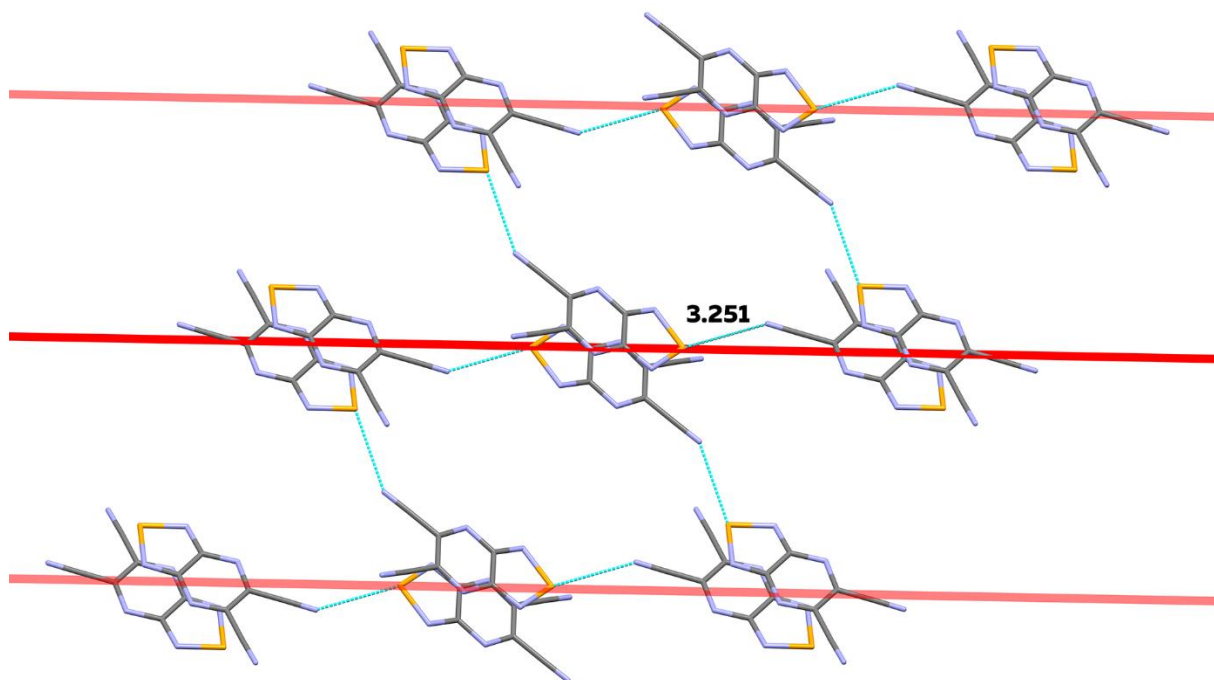

**Figure S1.** Fragment of crystal packing of **2** viewed along the crystallographic axis *a* and showing layers of RA dimers connected by shortened contacts Se...N (light blue lines). [K(18-crown-6)<sup>+</sup>] cations are omitted for clarity.

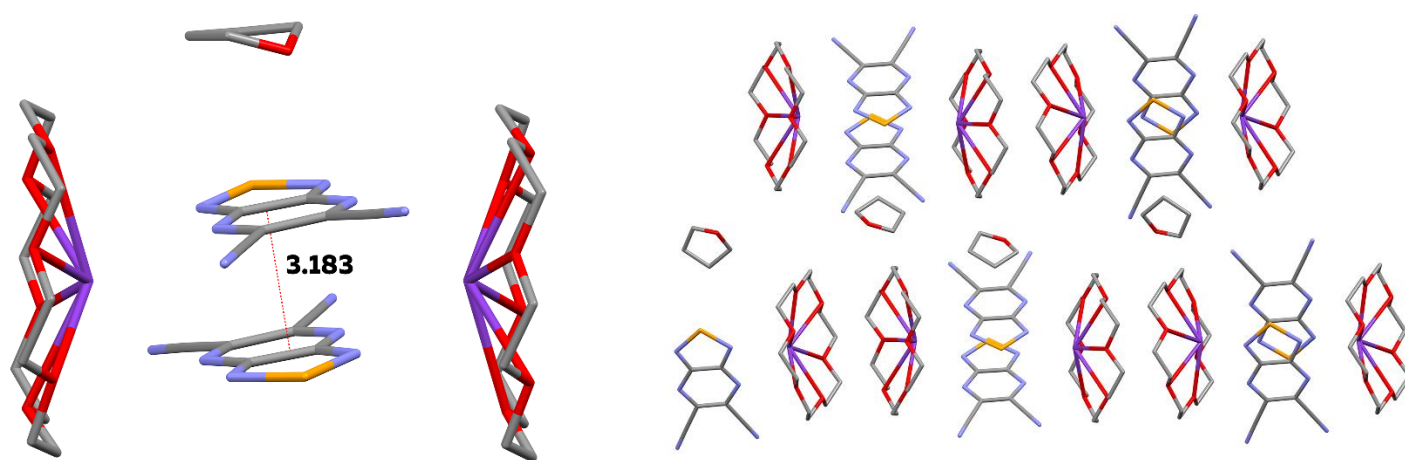

**Figure S2.** Left: XRD molecular structure of **2**·thf, H atoms are omitted for clarity. Right: Fragment of crystal packing viewed along the crystallographic axis *b* and showing layers of RA dimers. [K(18-crown-6)<sup>+</sup>]<sub>2</sub>[**1**]<sup>-2</sup> are separated by layers of thf molecules.

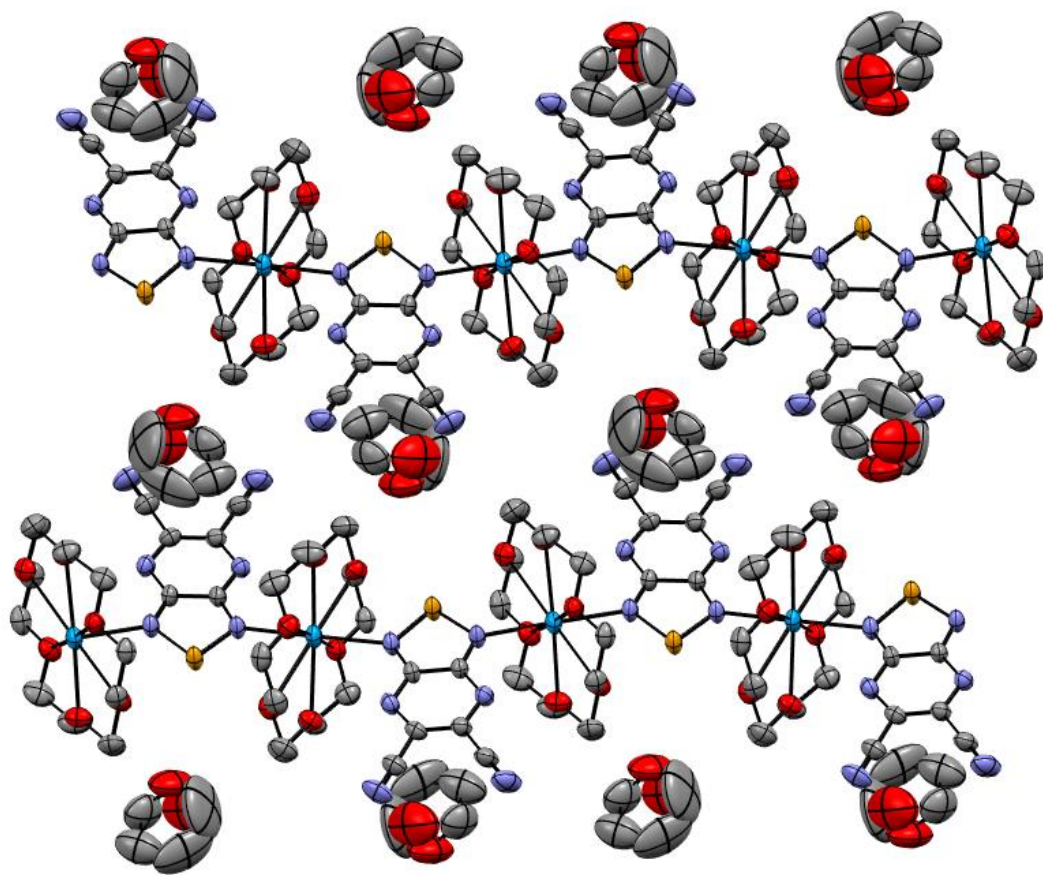

**Figure S3.** Fragment of crystal packing of **3**·thf featuring two parallel infinite chains of alternating cations and RAs with thf molecules filling the space between the chains (H atoms are omitted for clarity).

## 2. Powder X-ray diffraction

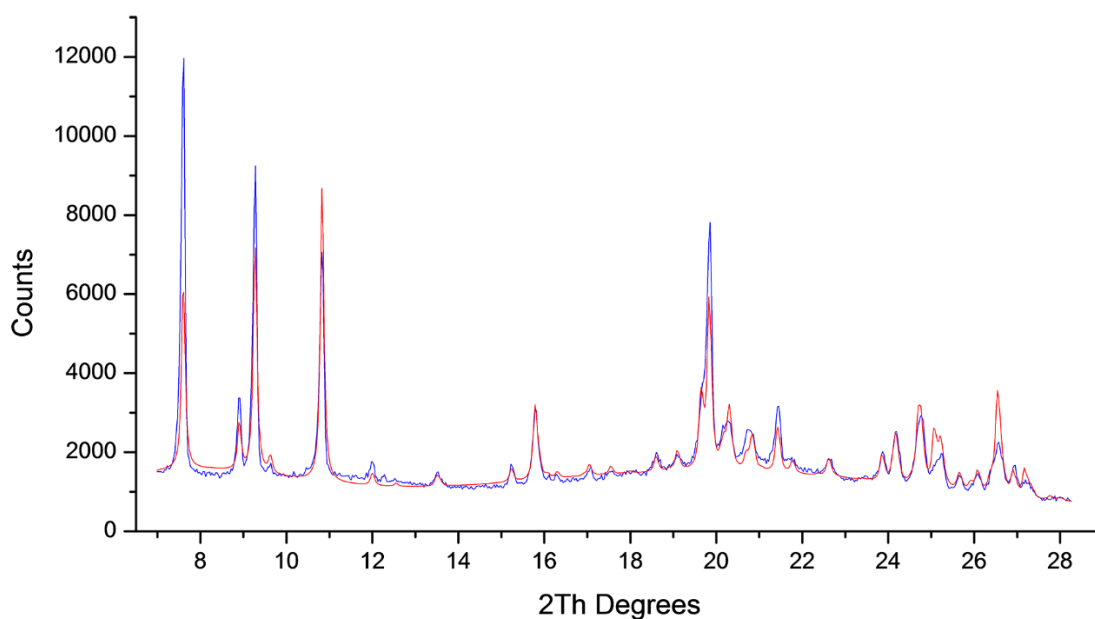

**Figure S4.** Powder XRD pattern for the non-crystalline sample of salt **2** (blue) and calculated pattern for the single-crystal XRD data for **2** (red).

## 3. Cyclic voltammetry

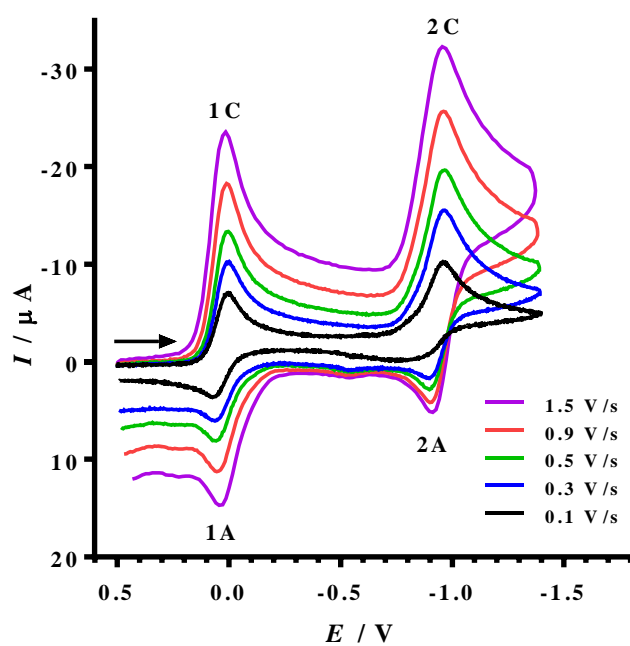

**Figure S5.** Cyclic voltammograms of reduction of compound **1** in MeCN solution with the potential sweep rates varied from 0.1 to 1.5  $\text{V}\cdot\text{s}^{-1}$  (depicted with colours). Black arrow indicates the direction of potential sweep.

#### 4. EPR spectroscopy

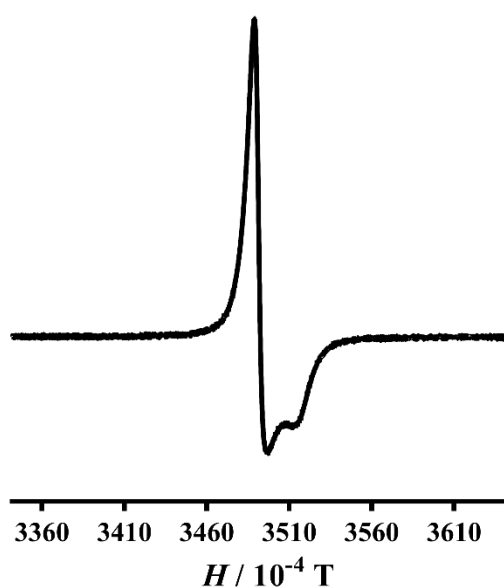

**Figure S6.** Weak signal in the solid-state EPR spectrum of salt **2**.

#### 5. SQUID magnetometry

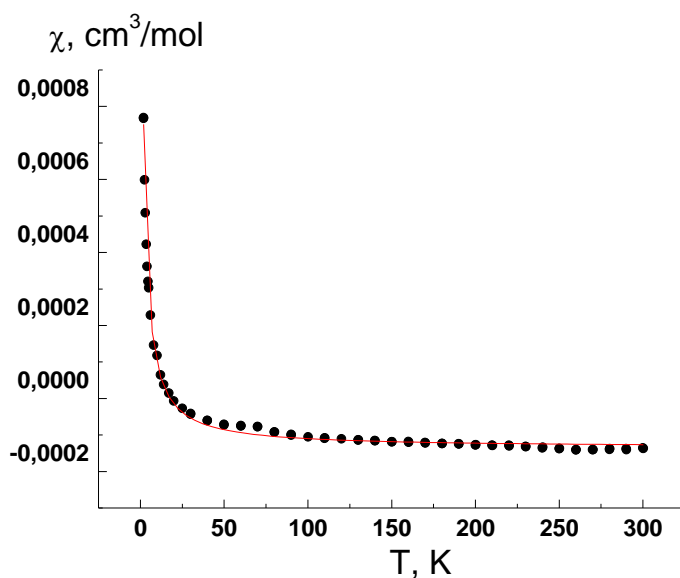

**Figure S7.** Temperature dependence of molar magnetic susceptibility  $\chi(T)$  of salt **2** in the temperature range 2-300 K. Solid line corresponds to the best fit, using an equation  $\chi = \chi_D + C/(T - \Theta)$ . The best fit parameter values of  $\chi_D$ ,  $C$  and  $\Theta$  are  $-130 \cdot 10^{-6} \text{ cm}^3 \text{ mol}^{-1}$ ,  $0.0025 \text{ K} \cdot \text{cm}^3/\text{mol}$  and  $-0.82 \text{ K}$ , respectively. So, diamagnetic susceptibility  $\chi_D = -130 \cdot 10^{-6} \text{ cm}^3 \text{ mol}^{-1}$ , and Curie constant value allows to estimate admixture of paramagnetic centers with spin  $S = 1/2$  as  $0.0025/0.375 = 0.0067 = 0.67\%$ .

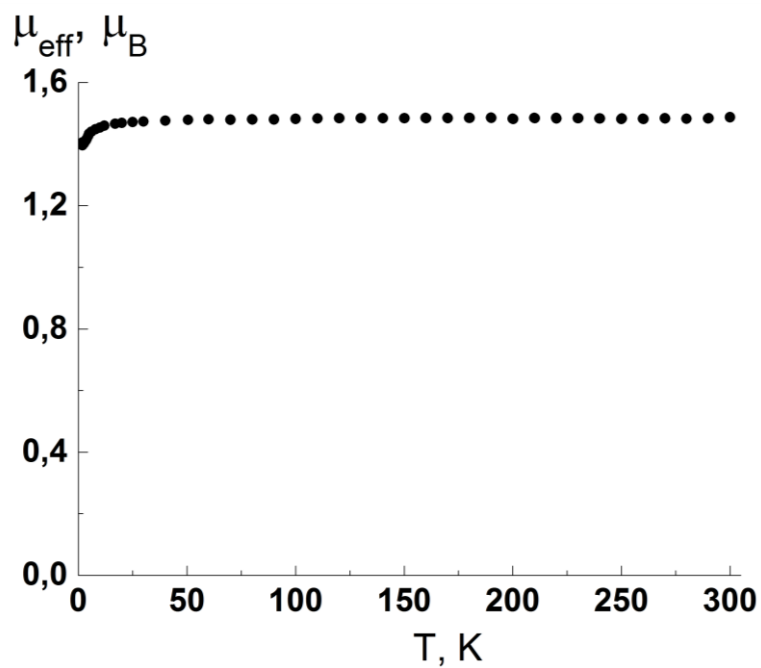

**Figure S8.** Temperature dependence of the effective magnetic moment  $\mu_{\text{eff}}(T)$  of salt **3** in the temperature range 2-300 K.

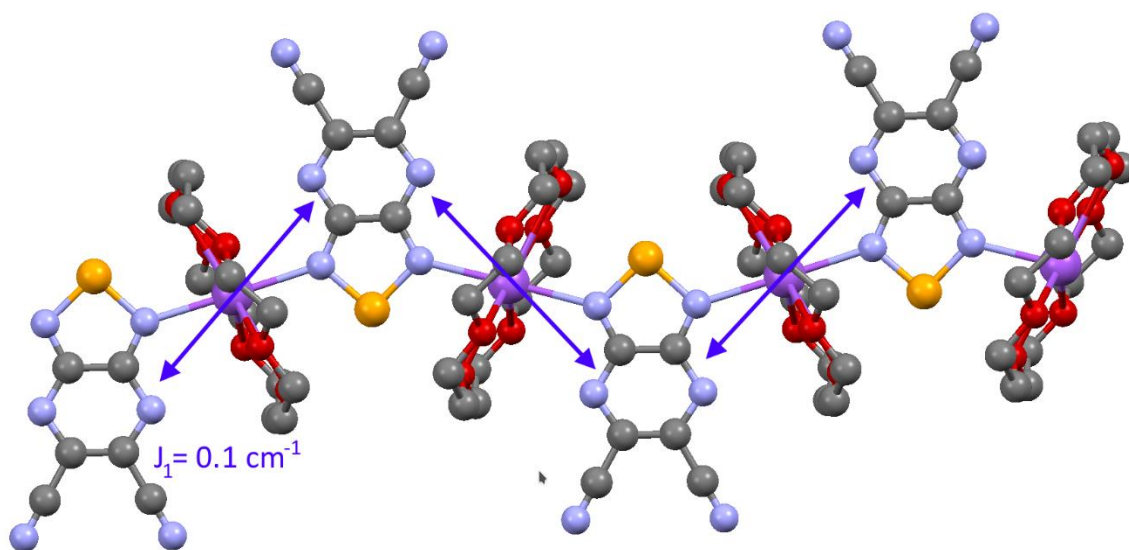

**Figure S9.** Fragment of the XRD structure of salt **3**-thf (alternating chain of RAs and cations) and intrachain pair exchange interactions indicated by arrows.
